# Supplementary material for: Cobalt–zinc nitride on nitrogen doped carbon black nanohybrids as a non-noble metal electrocatalyst for oxygen reduction reaction
Source: Royal Society of Chemistry journal article supplement (doi:10.1039/c7nr02264f), 2017-01-01
Supplement: c7nr02264f1.pdf [file c7nr02264f1.pdf]

## Supplementary Information

### Cobalt-zinc nitride on nitrogen doped carbon black nanohybrids as a non-noble metal electrocatalyst for oxygen reduction reaction

Y. Yuan,<sup>a,b</sup> L. Yang,<sup>a,b</sup> B. He,<sup>a</sup> E. Pervaiz,<sup>a,b</sup> Z. Shao<sup>a,\*</sup> and M. Yang<sup>a,\*</sup>

<sup>a</sup> Dalian Institute of Chemical Physics, Chinese Academy of Sciences, 457 Zhongshan Road, Dalian, 116023, China

<sup>b</sup> University of Chinese Academy of Sciences, 19 A Yuquan Rd, Shijingshan District, Beijing, 100049, P. R. China

<sup>c</sup> School of Chemical & Materials Engineering (SCME), National University of Sciences & Technology (NUST), Islamabad, 44000, Pakistan

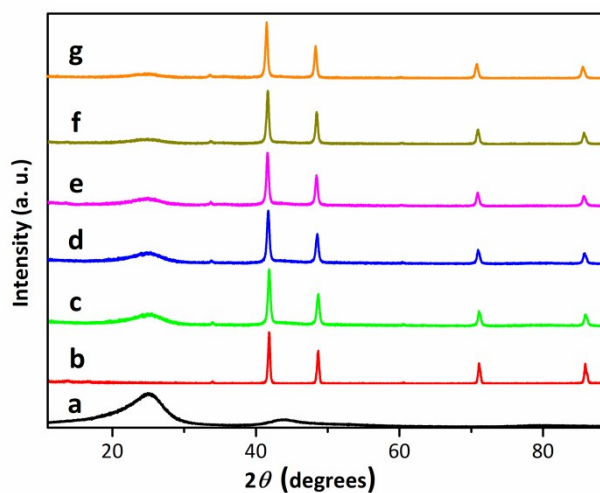

Fig. S1 XRD patterns of (a) carbon black, (b)  $\text{Co}_3\text{ZnN}$ , (c) carbon black supported 10%  $\text{Co}_3\text{ZnN}$ , (d) 20%, (e) 30%, (f) 40%, (g) 50%.

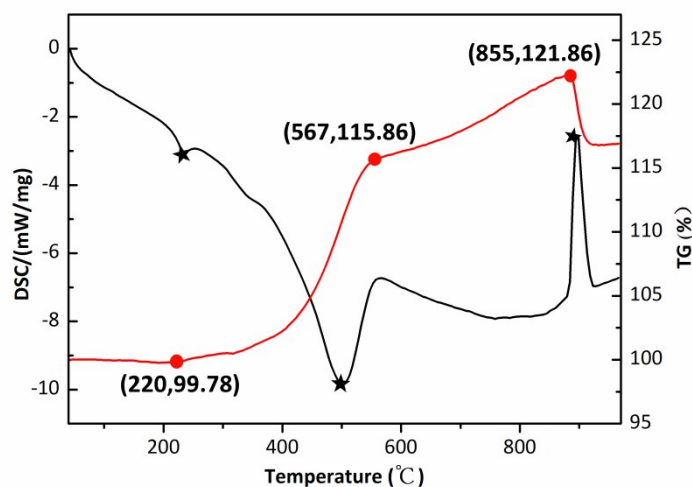

Fig. S2 Differential scanning calorimetry (DSC) and Thermogravimetric analysis (TGA) curves of  $\text{Co}_3\text{ZnN}$ .
